# Supplementary material
Source: Springer Nature journal article supplement (https://www.springermedizin.de/resource/supplementary/12913_2007_468_MOESM7_ESM.pdf/9534830)
Supplement: MOESM7 [file 9534830]

| <b>Determinant</b>             | <b>Methods from theory</b>                                                       | <b>Strategy</b>                                                                                                        | <b>Tools/Materials</b>                                                                                                                                                                                                                                                                                                                                                                                                                                                                      |
|--------------------------------|----------------------------------------------------------------------------------|------------------------------------------------------------------------------------------------------------------------|---------------------------------------------------------------------------------------------------------------------------------------------------------------------------------------------------------------------------------------------------------------------------------------------------------------------------------------------------------------------------------------------------------------------------------------------------------------------------------------------|
| Risk perception and knowledge. | Passive learning/providing information.<br><br>Active processing of information. | Providing written and verbal information.<br><br>Evaluating understanding.                                             | Letter sent to workers about research.<br><br>OP explains early RTW does not increase complaints.<br><br>OP explains about risk to end in work disability scheme.<br><br>Researcher explains PW-intervention in phone call and sends invitation with brochure, OP also explains and RC guides PW-intervention.<br>RC contributes to brainstorm for solutions.<br><br>OP instructs inventory of stressors to E as home assignment.<br><br>Inventory of obstacles for RTW in PW-intervention. |
| Attitude                       | Verbal persuasion                                                                | Providing arguments.                                                                                                   | OP provides arguments why sick leave does not have to be experienced passively, change of behaviour.<br><br>OP and RC emphasize the importance of consensus.                                                                                                                                                                                                                                                                                                                                |
| Skills                         | Guided practise.                                                                 | Guided practise.                                                                                                       | Practise explanation of obstacles to S with RC.                                                                                                                                                                                                                                                                                                                                                                                                                                             |
| Self-efficacy                  | Positive reinforcement                                                           | Providing feedback<br><br>Evaluation                                                                                   | RC focuses on work abilities of E.<br>RC performs an evaluation by phone.                                                                                                                                                                                                                                                                                                                                                                                                                   |
| Outcome expectations           | Check for comprehension.                                                         | Ask E to summarize.                                                                                                    | OP and RC ask E to summarize expectations about PW-intervention.                                                                                                                                                                                                                                                                                                                                                                                                                            |
| Safety and equality            | Guidance by independent person.<br><br>Create openness and respect.              | Train RC to guide PW-intervention.<br><br>Respect each others obstacles and solutions.                                 | Train RC to guide PW-intervention.<br><br>RC avoids discussion between E and S about truth of obstacles.                                                                                                                                                                                                                                                                                                                                                                                    |
| Support                        | Prevent inhibition.<br><br>Support from work environment.                        | Avoid fixed appointments about RTW before starting PW-intervention.<br><br>Participation of supervisor in RTW process. | OP does not establish RTW date before starting PW-intervention.<br><br>An increased participation of supervisor in RTW process through PW-intervention.                                                                                                                                                                                                                                                                                                                                     |
